# Supplementary material
Source: publisher figshare collection journal article supplement (https://wiley.figshare.com/ndownloader/files/13142504)
Supplement: Supplementary file 1 [file 13142504]

## Sheet: Fig 3_data
Author	Van den brouck et al. 2009
Year	2009
Title	Nickel and binary metal mixture responses in Daphnia magna: Molecular fingerprints and (sub)organismal effects.
Treatment	Ni
Species	Daphnia
Data	Digitized extraction
Growth metrc:	Length
Ni (mg/L)	growth-mean	CEA-mean	growth-% change	CEA-% change
0	1.95122	107.692
0.125	1.85366	137.179	-5	27.381	Van den brouck et al. 2009
0.5	1.52195	42.3077	-22	-60.7143	Van den brouck et al. 2009
1	1.25854	-3.84615	-35.5	-103.571	Van den brouck et al. 2009
2	1.13171	-5.12821	-42	-104.762	Van den brouck et al. 2009
Author	Rueda-Jasso
Year	2004
Title	Effect of dietary non-protein energy levels on condition and oxidative status of Senegalese sole (Solea senegalensis) juveniles.
Treatment	Diet
Species	sole
Data	provided
Growth metrc:	relative growth rate
Diet treatment	growth-mean	CEA-mean	growth-% change	CEA-% change
A	0.88	292.2
B	0.84	234.5	-4.54545	-19.7467	Rueda-Jasso et al. 2004
C	0.69	214.3	-21.5909	-26.6598	Rueda-Jasso et al. 2004
D	0.77	252.1	-12.5	-13.7235	Rueda-Jasso et al. 2004
Author	De Coen
Year	1997
Title	The use of biomarkers in Daphnia magna toxicity testing. IV. Cellular Energy Allocation: a new methodology to assess the energy budget of toxicant-stressed Daphnia populations.
Treatment	Lindane, HgCl
Species	Daphnia
Data	growth-provided; CEA-digitized extraction
Growth metrc:	carapax length
Lindane	growth-mean	CEA-mean	growth-% change	CEA-% change
Control	1.8	277.358
0.056	1.85	288.679	2.77778	4.08163	De Coen et al. 1997
0.1	1.8	308.491	0	11.2245	De Coen et al. 1997
0.18	1.85	250.472	2.77778	-9.69388	De Coen et al. 1997
0.32	1.75	191.038	-2.77778	-31.1224	De Coen et al. 1997
0.56	1.74	161.321	-3.33333	-41.8367	De Coen et al. 1997
0.75	1.46	93.3962	-18.8889	-66.3265	De Coen et al. 1997
HgCl	growth-mean	CEA-mean	growth-% change	CEA-% change
Control	1.85	278.201
1	1.77	317.647	-4.32432	14.1791	De Coen et al. 1997
3.2	1.8	306.228	-2.7027	10.0746	De Coen et al. 1997
5.6	1.82	262.63	-1.62162	-5.59701	De Coen et al. 1997
10	1.57	252.249	-15.1351	-9.32836	De Coen et al. 1997
18	1.34	129.758	-27.5676	-53.3582	De Coen et al. 1997
24	1.27	104.844	-31.3514	-62.3134	De Coen et al. 1997
32	1.21	36.3322	-34.5946	-86.9403	De Coen et al. 1997
Author	Muyssen
Year	2001
Title	Multigeneration zinc acclimation and tolerance in Daphnia magna: Implications for water-quality guidelines and ecological risk assessment
Treatment	Zn acclimation
Species	Daphnia
Data	growth-provided; CEA-digitized extraction
Growth metrc:	carapax length
Zn acclimation	growth-mean	CEA-mean	growth-% change	CEA-% change
3	3.2	265.753
13	2.8	210.274	-12.5	-20.8763	Muyssen et al. 2001
100	2.8	206.164	-12.5	-22.4227	Muyssen et al. 2001
200	2.9	228.767	-9.375	-13.9175	Muyssen et al. 2001
300	3.4	263.699	6.25	-0.773196	Muyssen et al. 2001
450	3.3	255.479	3.125	-3.86598	Muyssen et al. 2001
600	3	189.726	-6.25	-28.6082	Muyssen et al. 2001
800	3.2	113.699	0	-57.2165	Muyssen et al. 2001
Author	Soetaert
Year	2007
Title	Molecular responses during cadmium-induced stress in Daphnia magna: Integration of differential gene expression with higher-level effects.
Treatment	Daphnia
Species	Cd
Data	Digitized extraction
Growth metrc:	Length
48hr-Cd	growth-mean	CEA-mean	growth-% change	CEA-% change
0	1.24242	97.1591
10	1.24242	66.4773	0	-31.5789	Soetaert et al. 2007
50	1.15152	22.1591	-7.31707	-77.193	Soetaert et al. 2007
100	1.13636	6.81818	-8.53659	-92.9825	Soetaert et al. 2007
96hr-Cd	growth-mean	CEA-mean	growth-% change	CEA-% change
0	2.11194	412.941
10	1.93284	232.941	-8.48057	-43.5897	Soetaert et al. 2007
50	1.60448	42.3529	-24.0283	-89.7436	Soetaert et al. 2007
100	1.42537	5.29412	-32.5088	-98.7179	Soetaert et al. 2007
Author	Kim
Year	2012, 2014
Title	The individual and population effects of tetracycline on Daphnia magna in multigenerational exposure.
Title	Relationship between trans-generational effects of tetracycline on Daphnia magna at the physiological and whole organism level.
Treatment	tetracycline
Species	Daphnia
Data	Digitized extraction
Growth metrc:	relative body length
F0-tetracycline	growth-mean	CEA-mean	growth-% change	CEA-% change
0	100.062	172.691
0.1	99.7538	168.675	-0.307503	-2.32558	Kim et al. 2012,2014
1	92.3692	113.253	-7.68758	-34.4186	Kim et al. 2012,2014
10	83.4462	65.0602	-16.6052	-62.3256	Kim et al. 2012,2014
F1-tetracycline	growth-mean	CEA-mean	growth-% change	CEA-% change
0	100.062	133.333
0.1	108.062	129.317	7.99508	-3.01205	Kim et al. 2012,2014
1	99.4462	94.7791	-0.615006	-28.9157	Kim et al. 2012,2014
10	92.6769	81.1245	-7.38007	-39.1566	Kim et al. 2012,2014
F2-tetracycline	growth-mean	CEA-mean	growth-% change	CEA-% change
0	100.369	132.53
0.1	104.062	114.056	3.67872	-13.9394	Kim et al. 2012,2014
1	98.8308	114.056	-1.5328	-13.9394	Kim et al. 2012,2014
10	99.7538	65.8635	-0.613121	-50.303	Kim et al. 2012,2014
F3-tetracycline	growth-mean	CEA-mean	growth-% change	CEA-% change
0	100.369	145.382
0.1	104.369	77.1084	3.98529	-46.9613	Kim et al. 2012,2014
1	100.677	53.012	0.30656	-63.5359	Kim et al. 2012,2014
10	92.0615	53.012	-8.27713	-63.5359	Kim et al. 2012,2014

## Sheet: Fig 4a_data
Author	Year	Title	Species	MR units	Speed units	Max/Min derived from	Eqn	speed min	speed max	MR min	MR max	speed max (m/s)	MR %change
Chappell	2004		Mouse	ml/min	km/hr	regression eqn provided by study authors	VO2=1.916+(0.501*speed)	1	4	2.417	3.92	1.11111	62.1845
Chappell	2013		Weasel	ml/min	km/hr	regression eqn provided by study authors	VO2=4.30+(1.458*speed)	0	4	4.3	10.132	1.11111	135.628
Eme	2009		Alligator	ml/kg/min	km/hr	max/min-digitized extraction by Goodchild et al.	NA	0	2	4.39472	6.68354	0.555556	52.0811
Hawkes	2014		Geese (running)	ml/min	m/s	max/min-digitized extraction by Goodchild et al.	NA	0	1.09971	35.1554	103.47	1.09971	194.321
Secor	1992		Snke	ml/g/h	km/hr	regression eqn provided by study authors	VO2=1.82+(.408*speed)	0	0.5	1.82	2.024	0.138889	11.2088
Ward	2001		Starling (flying)	ml/min	m/s	max/min-digitized extraction by Goodchild et al.	NA	0	13.3	8.41287	37.4286	13.3	344.897
Webber	1986		Squid	ml/hr	m/s	max/min-digitized extraction by Goodchild et al.	NA	0	0.841653	147.867	572.512	0.841653	287.179

## Sheet: Fig 4b_data
Author	Year	Title	Common name	Species	MR units	Speed units	Max/Min derived from	Eqn	R2	Water Temp C	speed min (cm/s)	speed max (cm/s)	MR min	MR max	MR %change
Dickson	2012	Maximum sustainable speed, energetics and swimming kinematics of a tropical carangid fish, the green jack Caranx caballus	Green jack	Caranx caballus	mg/min	cm/s	regression eqn provided by study authors	VO2=-0.228+(0.014*speed)+.003*Mass	not given	27.2	20	120	0.9073	2.3073	154.304
Fangue	2014	Juvenile and adult hardhead Mylopharodon conocephalus oxygen consumption rates: effects of temperature and swimming velocity	Hard head	Mylopharodon conocephalus	mg/kg/hour	cm/s	regression eqn-digitized extraction by Goodchild et al.	VO2 = 6.236*speed + 72.968	0.9886	21	20	90	197.418	633.938	221.115
Fitzgibbon	2007	Metabolic scope, swimming performance and the effects of hypoxia in the mulloway, Argyrosomus japonicus (Pisces: Sciaenidae)	Mulloway	Argyrosomus japonicus	mg/kg/hour	cm/s	regression eqn provided by study authors	VO2=70.9e^(0.027*U)	0.86	22	20	60	121.665	358.264	194.468
Fu	2013	The effects of caudal fin loss and regeneration on the swimming performance of three cyprinid fish species with different swimming capacities	Qingbo	Spinibarbus sinensis	mg/kg/hour	cm/s	regression eqn provided by study authors	ln(VO2)=(0.03*U)+5.248	0.815	25	20	60	346.541	1150.56	232.012
Fu	2013	The effects of caudal fin loss and regeneration on the swimming performance of three cyprinid fish species with different swimming capacities	Common carp	Cyprinus carpio	mg/kg/hour	cm/s	regression eqn provided by study authors	ln(VO2)=(0.025*U)+5.464	0.778	25	20	55	389.164	933.555	139.888
Fu	2013	The effects of caudal fin loss and regeneration on the swimming performance of three cyprinid fish species with different swimming capacities	Goldfish	Carassius auratus	mg/kg/hour	cm/s	regression eqn provided by study authors	ln(VO2)=(0.031*U)+5.415	0.831	25	20	50	417.799	1058.91	153.451
Gamperl	2002	Metabolism, Swimming Performance, and Tissue Biochemistry of High Desert Redband Trout (Oncorhynchus mykiss ssp.): Evidence for Phenotypic Differences in Physiological Function	High dessert redband tout	Oncorhynchus mykiss ssp	mg/kg^-0.87/hour	cm/s	regression eqn-digitized extraction by Goodchild et al.	VO2=0.0431*U^2+3.3183*U+178.59	0.999	24	20	80	262.236	720.534	174.765
Li	2017	Effects of prolonged exercise training and exhaustive chasing training on the swimming performance of an endangered bream Megalobrama pellegrini	Bream	Megalobrama pellegrini	mg/kg/hour	cm/s	regression eqn provided by study authors	ln(VO2)=0.0202*U+5.9499	0.7592	25	20	66	574.73	1455.49	153.248
Makiguchi	2017	Sex differences in metabolic rate and swimming performance in pink salmon (Oncorhynchus gorbuscha): the effect of male secondary sexual traits	Pink salmon	Oncorhynchus gorbuscha	mg/kg/hour	m/s	regression eqn provided by study authors	VO2=167.9e^(1.23*U)	not given		20	150	214.727	1062.49	394.808
Nowell	2015	Swimming energetics and thermal ecology of adult bonefish (Albula vulpes): A combined laboratory and field study in Eleuthera, The Bahamas	Bone fish	Albula vulpes	mg/kg/min	cm/s	max/min-digitized extraction by Goodchild et al.	NA	NA		20	88.6	5.97826	11.82	97.7164
Tu	2012	Aerobic Swimming Performance of Juvenile Largemouth Bronze Gudgeon (Coreius guichenoti) in the Yangtze River	Gudgeon	Coreius guichenoti	mg/kg/hour	bl/s	regression eqn provided by study authors	VO2=236.6+2.44*U^2.44	not given	20	20	121.31	240.061	518.068	115.807
Tudorache	2015	Comparison of swimming capacity and energetics of migratory European eel (Anguilla anguilla) and New Zealand short-finned eel (A. australis)	European eel	Anguilla anguilla	mg/kg/hour	m/s	regression eqn provided by study authors	VO2=45.65*e^(1.5624*u)	not given		20	90	69.0526	206.153	198.545
Li	2010	The effect of exercise training on the metabolic interaction between digestion and locomotion in juvenile darkbarbel catfish (Peltebagrus vachelli)	Darkbarbel catfish	Peltebagrus vachelli	mg/kg/hour	cm/s	regression eqn-digitized extraction	VO2=0.3065U^2+1.8087U+336.17	0.99911		20	56	495.944	1399.64	182.218

## Sheet: Fig 4c_data
Author	Year	Species	AS units	Ucrit units	Trend eqn	Eqn	AS min	AS max	Ucrit min	Ucrit max	AS %change	Ucrit %change
Reidy	2000	Atlantic cod	umol O2/kg/min	cm/s	digitized extraction and calculated by Goodchild et al.	Ucrit=0.2533*AS+49.933	22.259	77.5758	55.5712	69.5829	248.515	25.214
McDonnall and Chapman	2016	African cichlid	mg O2/g/hr	BL/s	digitized extraction and calculated by Goodchild et al.	Ucrit=43.422*AS+1.2992	0.105687	0.186091	5.88835	9.37966	76.0774	59.2917
Pang	2015	Black carp	mg O2/kg/hr	cm/s	provided by study authors	ln(as)=0.021*Ucrit+5.283	488.536	786.297	43.2578	65.9207	60.9495	52.3903
Pang	2015	Common carp	mg O2/hr	cm/s	provided by study authors	Ucrit=0.153*AS-0	0.543733	1.3657	0.142177	0.161557	151.172	13.6306

## Sheet: Fig 4d_data
Author	Year	Title	Common name	Species	Contaminant	AS units	Ucrit units	Data (mean +/- SE)	AS-con mean	AS-con se	AS-trt mean	AS-trt se	Ucrit-con mean	Ucrit-con se	Ucrit-trt mean	Ucrit-trt se
Johansen	2017	Sustained impairment of respiratory function and swim performance following acute oil exposure in a coastal marine fish	Red drum	Sciaenops ocellatus	PAH	% control	% control	digitized extraction by Goodchild et al.	0.160643	3.61446	-26.5462	6.2249	0.2	2	-17	4.8
Mager	2011	Effects of acute and chronic waterborne lead exposure on the swimming performance and aerobic scope of fathead minnows (Pimephales promelas)	Fathead minnow	Pimephales promelas	Pb	umol/g/hr	BL/s	digitized extraction by Goodchild et al.	22.7097	3.6129	8.51613	2.58065	27.4775	0.900901	24.3243	1.26126
Masse	2013	Reduced swim performance and aerobic capacity in adult zebrafish exposed to waterborne selenite	Zebrafish	Danio rerio	Selenite	mg/kg/hr	BL/s	digitized extraction by Goodchild et al.	1795.77	223.005	997.653	187.793	11.0588	0.823529	8.11765	0.823529
Stieglitz	2016	Impacts of Deepwater Horizon crude oil exposure on adult mahi-mahi (Coryphaena hippurus) swim performance	Mahi mahi	Coryphaena hippurus	PAH	mg/kg/hr	BL/s	digitized extraction by Goodchild et al.	1195.57	71.9557	846.863	88.5609	4.09639	0.100402	3.51406	0.140562

## Sheet: Fig 5_data
Author:	Smolders
Year:	2004
Title:	Cellular energy allocation in zebra mussels exposed along a pollution gradient: linking cellular effects to higher levels of biological organization
Data extraction:	Data table
	treatment/loacation	SFG	excretion	Absorbance	Respiration	CR	Notes	SFG-%change	RR-%change	CR-%change
	location 1	0.021			0.021	0.047	day 28	0.304348	1.3125	0.522222
	location 2	0.028			0.018	0.048	day 28	0.405797	1.125	0.533333
	location 3	0.022			0.012	0.036	day 28	0.318841	0.75	0.4
	location 4	0.037			0.014	0.055	day 28	0.536232	0.875	0.611111
	location 5	0.031			0.016	0.05	day 28	0.449275	1	0.555556
	reference	0.069			0.016	0.09	day 28
Author:	Fernandez
Year:	2010
Title:	Integrated assessment of water quality of the Costa da Morte (Galicia, NW Spain) by means of mussel chemical, biochemical and physiological parameters.
Data extraction:	Data table
	treatment/loacation	SFG	excretion	Absorbance	Respiration	CR	Notes	SFG-%change	RR-%change	CR-%change
	Sta M Oia	92.2	1.6	102.6	8.8	5.8	April
	Muxia	79.6	1.7	90.4	9.1	5.1	April	0.863341	0.881092	1.03409
	Corrubedo	79.6	1.2	87.7	6.8	4.9	April	0.863341	0.854776	0.772727
	Caion	78.3	1.2	89.6	10.2	5.1	April	0.849241	0.873294	1.15909
	Punta Insua	72.7	1.3	82	8	4.6	April	0.788503	0.79922	0.909091
	Punta Insua	70.4	0.3	76.3	5.7	4.9	November
	Sta M Oia	66.3	0.6	72.4	5.5	4.6	November	0.968363	0.964912	0.938776
	Muxia	60.5	0.3	65.9	5.1	4.2	November	0.911967	0.894737	0.857143
	Caion	56.3	0.3	62	5.4	4	November	0.832187	0.947368	0.816327
	Corrubedo	53.7	0.5	58.9	4.7	3.8	November	0.774415	0.824561	0.77551
Author:	Halldorsson
Year:	2005
Title:	The effect of pollution on scope for growth of the mussel (Mytilus edulis L.) in Iceland.
Data extraction:	Data table
	treatment/loacation	SFG	excretion	Absorbance	Respiration	CR	Notes	SFG-%change	RR-%change	CR-%change
	Resident Mussels
	Reference (Hvalfjorour)	7.33		15.63	8.3	3.13	2017-04-10
	Keflavik harbour	10.46		18.51	8.05	3.7	2017-04-07	1.42701	0.96988	1.18211
	Reference (Hvalfjorour)	10.38		16.01	5.63	3.2	2017-09-21
	Reykyavfk harbour, mouth	0.05		9.86	9.83	1.97	2017-09-28	0.00481696	1.746	0.615625
	Hafnarfjorour harbour	6.16		13.52	7.36	2.7	2017-10-14	0.593449	1.30728	0.84375
	Keflavik harbour	10.17		19.5	9.33	3.9	2017-10-02	0.979769	1.65719	1.21875
	Transplanted Mussels							SFG-%change	RR-%change	CR-%change
	Hvalfjorour (reference)	13.61		21.9	7.58	4.24	2017-11-23
	Island of Perney	14.2		19.24	5.04	3.85	2017-11-28	1.04335	0.664908	0.908019
	Reykjavik, mouth	8.28		15.79	16.47	3.16	2017-11-18	0.608376	2.17282	0.745283
	Hvalfjorour (reference)	5.17		12.03	6.87	2.41	2017-10-17
	Island of Videy	3.7		9.76	6.07	1.95	2017-11-13	0.715667	0.883552	0.809129
	Reykjavik, mouth	3.13		9.79	6.65	1.96	2017-10-31	0.605416	0.967977	0.813278
	Reykjavik, inner	2.3		11.06	8.76	2.21	2017-10-23	0.444874	1.27511	0.917012
	Hafnarfjodur harbour	3.23		10.44	7.21	2.09	2017-10-26	0.624758	1.04949	0.86722
	Njarovik harbour	4.51		10.21	5.71	2.04	2017-11-06	0.87234	0.83115	0.846473
	Hvalfjorour (reference)	11.74		17.62	5.88	3.52	2001-02-20
	Reykjavik harbour, mouth	6.87		15.64	8.77	3.13	2017-02-22	0.585179	1.4915	0.889205
Author:	Tsangaris
Year:	2007
Title:	Assessment of the impact of heavy metal pollution from a ferro-nickel smelting plant using biomarkers.
Data extraction:	Data table
	treatment/loacation	SFG	excretion	Absorbance	Respiration	CR	Notes	SFG-%change	RR-%change	CR-%change
	Field Mussel Populations
	Larymna native	-5		10.8	15.8
	Larymna transplanted	-2.2		7.8	10		6-months	-0.106796	0.23494
	Larymna transplanted	1.7		7.5	9.2		1- month	0.0825243	0.225904
	Reference site	20.6		33.2	12.6
	Lab-exposed Mussels
	high exposure	6.4		19.3	12.9			0.367816	0.689286
	low exposure	11.2		22.5	11.3			0.643678	0.803571
	control	17.4		28	10.6
Author:	Widdows
Year:	1995
Title:	Scope for Growth and Contaminant Levels in North-Sea Mussels Mytilus-Edulis
Data extraction:	Data table
	treatment/loacation	SFG	excretion	Absorbance	Respiration	CR	Notes	SFG-%change	RR-%change	CR-%change
	Mussels from coastal sites
	Musselburgh	23.07		0.46	21.3	7.79
	holy Island	22.08		0.51	22.9	6.95		0.957087	1.07512	0.892169
	Lucky Beacon	21.11		0.43	18.1	8.19		0.915041	0.849765	1.05135
	Voxter Voe	20.94		0.51	23.3	6.74		0.907672	1.0939	0.865212
	Trow Rocks	20.62		0.6	23.3	5.68		0.893801	1.0939	0.72914
	Orkney	19.63		0.38	15.9	7.65		0.850889	0.746479	0.982028
	Berwick upon Tweed	17.19		0.44	21.6	6.75		0.745124	1.01408	0.866496
	Glss Voe	16.41		0.46	20.6	6.17		0.711313	0.967136	0.792041
	Cresswell	11.89		0.57	21.2	4.07		0.515388	0.995305	0.522465
	Coques Estuary	11.49		0.43	19.5	5.17		0.498049	0.915493	0.663671
	Montrose	9.75		0.33	18.9	5.04		0.422627	0.887324	0.646983
	Gat Sand-Wash	9.23		0.59	20.3	3.36		0.400087	0.953052	0.431322
	Whitby Harbour	8.33		0.42	20.3	4.6		0.361075	0.953052	0.590501
	Walberswick	7.22		0.35	16.6	4.59		0.312961	0.779343	0.589217
	Filey Brigg	6.77		0.47	17.4	3.42		0.293455	0.816901	0.439024
	Teesmouth	4.82		0.45	22.8	3.68		0.208929	1.07042	0.472401
	Creeksea	4.41		0.32	15.1	3.84		0.191157	0.70892	0.49294
	Blyth	4.35		0.3	20.4	5.03		0.188557	0.957746	0.6457
	Whitstable	4.2		0.32	19	4.38		0.182055	0.892019	0.562259
	Hunstanton	3.05		0.56	17.8	2.15		0.132206	0.835681	0.275995
	Harwich	2.95		0.25	16.5	4.49		0.127872	0.774648	0.57638
	Humber Bull Fort	2.73		0.3	27.2	5.41		0.118336	1.277	0.69448
	Southend	1.49		0.31	15.8	3.07		0.064586	0.741784	0.394095
	Cleethorpes	0.98		0.43	20.3	2.6		0.0424794	0.953052	0.333761
	Swale	-1.02		0.25	17.9	3.09		-0.0442133	0.840376	0.396662
	Ythan Estuary	-1.08		0.33	18.8	3		-0.046814	0.882629	0.385109
	Mussel Transplants to light vessels							SFG-%change	RR-%change	CR-%change
	Shipwash	nd		nd	nd	nd
	Dudgeon	14.91		0.62	10	3.36
	Dowsing	14.08		0.6	8.71	3.3		0.944333	0.871	0.982143
	South Goodwin	13.61		0.57	10.7	3.5		0.91281	1.07	1.04167
	Sunk	13.15		0.5	10.6	3.89		0.881958	1.06	1.15774
	East Goodwin	13.11		0.54	10.6	3.65		0.879276	1.06	1.08631
	Newarp	12.22		0.54	8.9	3.28		0.819584	0.89	0.97619
	Sanettie	12.22		0.63	9.3	2.82		0.819584	0.93	0.839286
	Smiths Knoll	10.29		0.53	10.2	3.08		0.690141	1.02	0.916667
	Falls	8.87		0.46	9.8	3.14		0.594903	0.98	0.934524
	Exmouth- source	8.55		0.51	11.7	3		0.573441	1.17	0.892857
Author:	Widdows
Year:	1997
Title:	Effects of pollution on the scope for growth of mussels (Mytilus galloprovincialis) from the Venice Lagoon, Italy
Data extraction:	Data table
	treatment/loacation	SFG	excretion	Absorbance	Respiration	CR	Notes	SFG-%change	RR-%change	CR-%change
	Lio Grande	251		0.68	37.1	6.59
	Isola di Cervan	192		0.5	32.56	5.92		0.76494	0.877628	0.898331
	Chioggia	111		0.63	27.51	6.88		0.442231	0.741509	1.04401
	Punta Salute	102		0.26	31.72	3.9		0.406375	0.854987	0.591806
	Alberoni	57		0.66	22.24	4.51		0.227092	0.599461	0.68437
	Canale Vittorio Emanuele	41		0.16	25.41	1.75		0.163347	0.684906	0.265554
Author:	Tsangaris
Year:	2010
Title:	Assessment of contaminant impacts in a semi-enclosed estuary (Amvrakikos Gulf, NW Greece): Bioenergetics and biochemical biomarkers in mussels.
Data extraction:	Data table; digitized extraction
	treatment/loacation	SFG	excretion	Absorbance	Respiration	CR	Notes	SFG-%change	RR-%change	CR-%change
	Salaora	-2.25806		0.32	22.19	2.96	Autumn 1996	-0.479452	1.31691	0.757033
	Mazoma	4.70968		0.38	16.85	3.91
	Salaora	-5.16129		0.26	18.19	2.48	Winter 1997	-0.952381	1.50206	0.578089
	Mazoma	5.41935		0.52	12.11	4.29
	Salaora	0.709677		0.57	17.04	1.92	Spring 1997	0.0973451	0.715666	0.51752
	Mazoma	7.29032		0.63	23.81	3.71
	Salaora	-5.22581		0.7	29.11	1.42	Summer 1997	-0.94186	1.80471	0.550388
	Mazoma	5.54839		0.62	16.13	2.58
	Salaora	0.645161		0.4	12.33	1.23	Winter 1998	0.178571	0.741431	0.608911
	Mazoma	3.6129		0.44	16.63	2.02
Author:	Neuberger-Cywiak
Year:	2007
Title:	Effects of sublethal Zn ++ and Cd ++ concentrations on filtration rate, absorption efficiency and scope for growth in Donax trunculus (Bivalvia; Donacidae).
Data extraction:	Data table
	treatment/loacation	SFG	excretion	Absorbance	Respiration	CR	Notes	SFG-%change	RR-%change	CR-%change
	Zn++
	0 ppm	17.583	0.0893	88.43	3.597	100	24 hours
	.1 ppm	15.706	0.127	89.32	2.434	85		0.893249	0.676675	0.85
	1 ppm	3.866	0.113	89.11	0.871	22.6		0.219871	0.242146	0.226
	10 ppm	0.079	0.023	55.93	0.478	4.32		0.00449298	0.132889	0.0432
	0 ppm	13.803	0.144	83.11	4.047	100	48 hours
	.1 ppm	11.761	0.125	84.21	2.738	80.19		0.852061	0.676551	0.8019
	1 ppm	9.103	0.184	82.64	1.323	59.26		0.659494	0.326909	0.5926
	10 ppm	-0.296	0.044	73.55	0.659	2.56		-0.0214446	0.162837	0.0256
	Cd++
	0 ppm	17.379	0.0534	87.43	3.5971	100	24 hours
	.1 ppm	6.203	0.0577	80.51	1.7385	42.32		0.356925	0.483306	0.4232
	1 ppm	5.604	0.0697	78.15	1.2947	37.04		0.322458	0.359929	0.3704
	10 ppm	null	0.0116	null	0.4784	6.17
	0 ppm	13.894	0.1219	83.43	4.047	100	48 hours
	.1 ppm	7.418	0.1222	49.87	1.4128	82.9		0.5339	0.349098	0.829
	1 ppm	3.274	0.1004	41.08	0.629	45		0.235641	0.155424	0.45
	10 ppm	null	0.0177	null	0.1363	8.56
Author:	Widdows
Year:	1990
Title:	Measurement of physiological energetics (scope for growth) and chemical contaminants in mussels (Arca zebra) transplanted along a contamination gradient in Bermuda.
Data extraction:	Data table
	treatment/loacation	SFG	excretion	Absorbance	Respiration	CR	Notes	SFG-%change	RR-%change	CR-%change
	Castle Harbour
	C1	8.73		16.27	7.53	3.34
	Hamilton Harbour
	H1	8.06		14.87	6.84	2.9		0.923253	0.908367	0.868263
	H2	3.4		11.92	8.36	2.33		0.389462	1.11023	0.697605
	H3	5.03		12.29	7.37	2.41		0.576174	0.978752	0.721557
	H4	3		10.63	7.61	2.08		0.343643	1.01062	0.622754
	H5	9.81		16.01	6.19	3.13		1.12371	0.822045	0.937126
Author:	Sobral
Year:	1997
Title:	Effects of Copper Exposure on the Scope for Growth of the Clam Ruditapes decussatus from southern Portugal.
Data extraction:	Data table
	treatment/loacation	SFG	excretion	Absorbance	Respiration	CR	Notes	SFG-%change	RR-%change	CR-%change
	Control	16.1		42.5	5.8	48.7	Day 0
	0.01 mg	16.1		42.5	5.8	48.7		1	1	1
	Control	16.3		43.8	5.9	50.8	Day 2
	0.01 mg	8.4		62.6	6.9	24.2		0.515337	1.16949	0.476378
	Control	16		55.4	5.8	39.6	Day 5
	0.01 mg	-3.2		55.4	6.7	5.6		-0.2	1.15517	0.141414
	control	12.5		54.8	4.8	32.8	Day 9
	0.01 mg	2.8		44.3	6.1	19.9		0.224	1.27083	0.606707
	Control	23.9		62.1	4.1	46.8	Day 14
	0.01 mg	4.9		10.7	6.6	20.7		0.205021	1.60976	0.442308
	control	23.1		55.9	5.1	47.8	Day 20
	0.01 mg	5.4		11.9	7.6	21.9		0.233766	1.4902	0.458159
